# Supplementary material
Source: publisher site journal article supplement (https://www.dovepress.com/article/562194)
Supplement: Supplementary file 1 [file 562194%20Supplementary%20Material.pdf]

Table S1. Sensitivity Analysis

| Variable               | TUG Steps<br>Included<br>(n=166) | TUG Steps<br>Excluded<br>(n=28) | <i>P</i>    | Logistic<br>Regression<br>included (CU<br>only; n=111) | Logistic<br>Regression<br>excluded (CU<br>only; n=39) | <i>P</i> | GAM<br>Included (CU<br>only; n=91) | GAM Excluded<br>(CU only;<br>n=59) | <i>P</i>    |
|------------------------|----------------------------------|---------------------------------|-------------|--------------------------------------------------------|-------------------------------------------------------|----------|------------------------------------|------------------------------------|-------------|
| Age (years)            | 67.3 (6.11)                      | 67.0 (5.87)                     | .816        | 67.0 (6.19)                                            | 67.4 (5.07)                                           | .727     | 67.2 (6.43)                        | 66.9 (5.02)                        | .814        |
| Gender (f/m)           | 97/69                            | 15/13                           | .632        | 70/41                                                  | 24/15                                                 | .867     | 59/32                              | 35/24                              | .499        |
| Education<br>(years)   | 16.3 (2.32)                      | 17.1 (2.68)                     | .082        | 16.6 (2.37)                                            | 16.1 (2.31)                                           | .230     | 16.5 (2.31)                        | 16.4 (2.44)                        | .826        |
| MoCA (score)           | 26.7 (2.62)                      | 26.4 (3.39)                     | .595        | 27.4 (1.93)                                            | 27.4 (1.94)                                           | .922     | 27.5 (1.77)                        | 27.4 (2.16)                        | .813        |
| APOE<br>(ε4+/ε4-)      | 94/71                            | 10/18                           | <b>.042</b> | 61/50                                                  | 22/17                                                 | .999     | 30/29                              | 53/38                              | .404        |
| CDR (score<br>=0 / >0) | 141/23                           | 24/4                            | .999        | 106/3                                                  | 36/3                                                  | .187     | 88/1                               | 54/5                               | <b>.037</b> |

Note. APOE = Apolipoprotein E, CDR = Clinical Dementia Rating Scale, CU = Cognitively Unimpaired, GAM = Generalized Additive Model, MoCA = Montreal Canadian Assessment, TUG = Timed Up and Go. Bolded p-values indicate statistical significance below the alpha = .05. Values are given as mean (SD) unless otherwise specified.

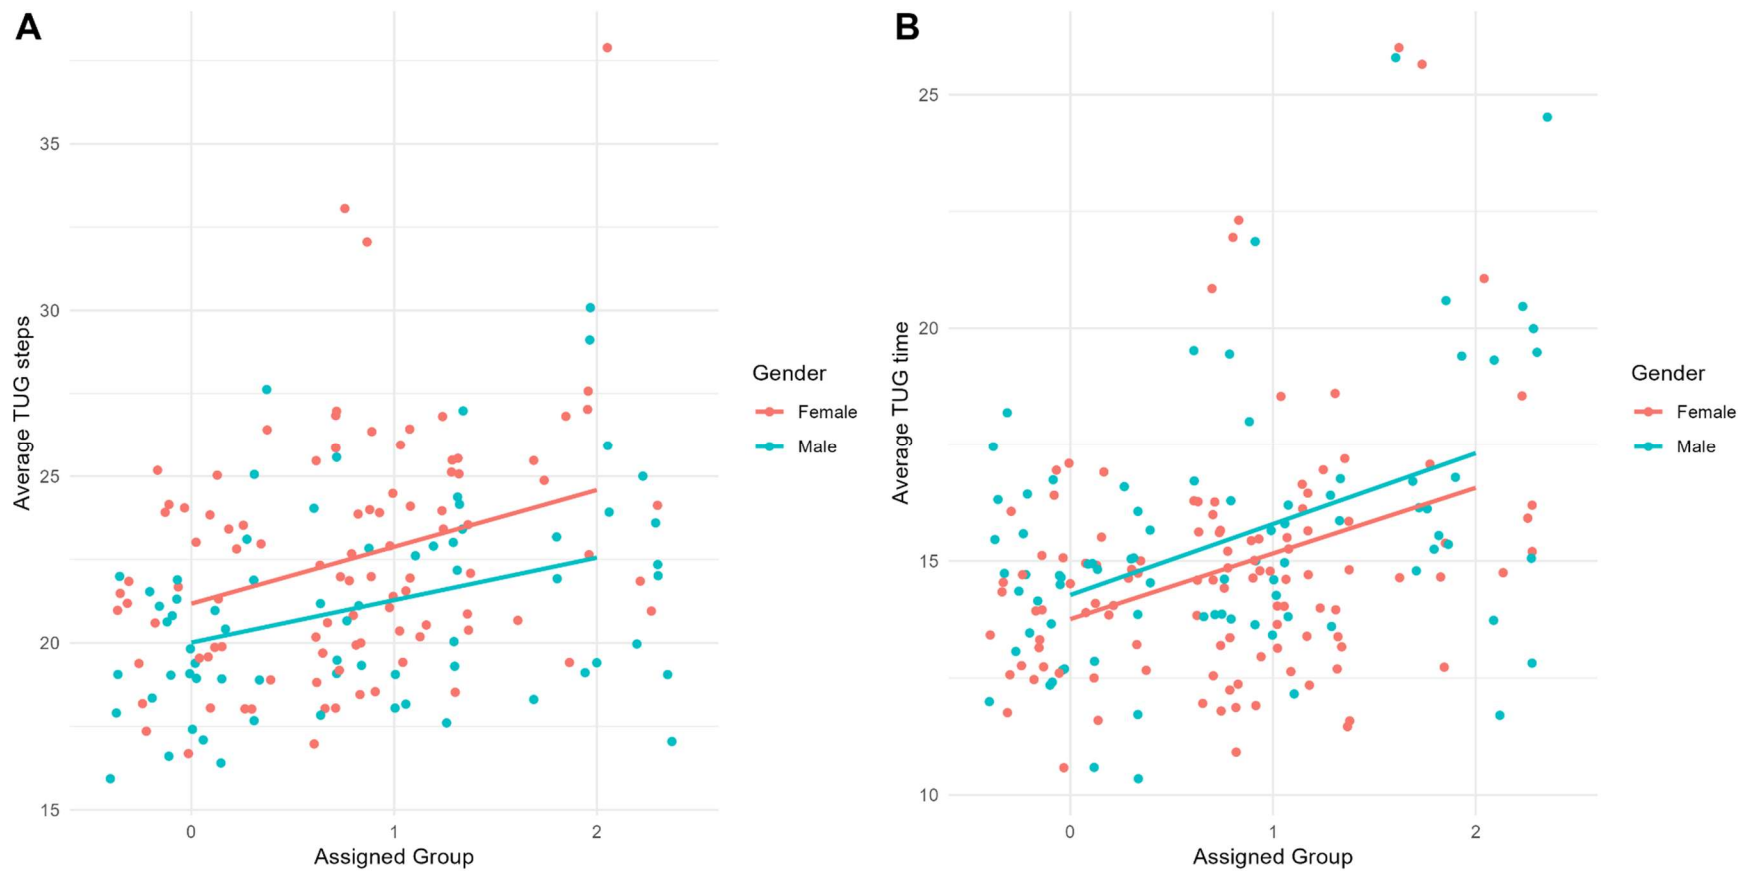

**Figure S1:** Scatterplots illustrating gender differences on average TUG steps and time across group assignments. A. Scatterplot of the average number of steps taken for completion on the TUG by females (red) and males (blue) across group assignments. Males took significantly fewer steps than females. B. Scatterplot of the average time to completion on the TUG by females (red) and males (blue) across group assignments.
